# Functional Network Endophenotypes Unravel the Effects of Apolipoprotein E Epsilon 4 in Middle-Aged Adults

Joseph S. Goveas<sup>1,9</sup>, Chunming Xie<sup>2,9</sup>, Gang Chen<sup>2</sup>, Wenjun Li<sup>2</sup>, B. Douglas Ward<sup>2</sup>, Malgorzata B. Franczak<sup>3</sup>, Jennifer L. Jones<sup>3</sup>, Piero G. Antuono<sup>3</sup>, Shi-Jiang Li<sup>1,2\*</sup>

**1** Department of Psychiatry and Behavioral Medicine, Medical College of Wisconsin, Milwaukee, Wisconsin, United States of America, **2** Department of Biophysics, Medical College of Wisconsin, Milwaukee, Wisconsin, United States of America, **3** Department of Neurology, Medical College of Wisconsin, Milwaukee, Wisconsin, United States of America

## Abstract

Apolipoprotein E-ε4 (APOE-ε4) accentuates memory decline, structural volume loss and cerebral amyloid deposition in cognitively healthy adults. We investigated whether APOE-ε4 carriers will show disruptions in the intrinsic cognitive networks, including the default mode (DMN), executive control (ECN) and salience (SN) networks, relative to noncarriers in middle-aged healthy adults; and the extent to which episodic-memory performance is related to the altered functional connectivity (Fc) in these networks. Resting-state functional connectivity MRI (R-fMRI) was used to measure the differences in the DMN, ECN and SN Fc between 20 APOE-ε4 carriers and 26 noncarriers. Multiple linear regression analyses were performed to determine the relationship between episodic-memory performance and Fc differences in the three resting-state networks across all subjects. There were no significant differences in the demographic and neuropsychological characteristics and the gray-matter volumes in the carriers and noncarriers. While mostly diminished DMN and ECN functional connectivities were seen, enhanced connections to the DMN structures were found in the SN in ε4 carriers. Altered DMN and ECN were associated with episodic memory performance. Significant Fc differences in the brain networks implicated in cognition were seen in middle-aged individuals with a genetic risk for AD, in the absence of cognitive decline and gray-matter atrophy. Prospective studies are essential to elucidate the potential of R-fMRI technique as a biomarker for predicting conversion from normal to early AD in healthy APOE-ε4 carriers.

**Citation:** Goveas JS, Xie C, Chen G, Li W, Ward BD, et al. (2013) Functional Network Endophenotypes Unravel the Effects of Apolipoprotein E Epsilon 4 in Middle-Aged Adults. PLoS ONE 8(2): e55902. doi:10.1371/journal.pone.0055902

**Editor:** Yong He, Beijing Normal University, China

**Received:** June 27, 2012; **Accepted:** January 4, 2013; **Published:** February 12, 2013

**Copyright:** © 2013 Goveas et al. This is an open-access article distributed under the terms of the Creative Commons Attribution License, which permits unrestricted use, distribution, and reproduction in any medium, provided the original author and source are credited.

**Funding:** This work was supported by Extendicare Foundation grant (to PGA), National Institutes of Health grant R01 AD20279 (to SJL), Alzheimer's Association New Investigator IRG-11-204070 (to JSG), Advancing Healthier Wisconsin Endowment for Research to MCW (to JSG), 1UL1RR031973 from the Clinical and Translational Science Award program of the National Center for Research Resources (to PGA, JSG, SJL), and the National Natural Science of Foundation of China 81171021, 91132727, 81171323 (to CX). The funders had no role in study design, data collection and analysis, decision to publish, or preparation of the manuscript.

**Competing Interests:** The authors have declared that no competing interests exist.

\* E-mail: sjli@mcw.edu

<sup>9</sup> These authors contributed equally to this work.

## Introduction

Imaging genetics, a rapidly growing field in neuroscience, utilizes an imaging endophenotype to study the genetic influences on human cognitive function and behavior [1]. Imaging endophenotypes are commonly used as biomarkers in Alzheimer's disease (AD) research because they are powerful techniques that can indicate disease-specific changes long before clinical evidence of neurodegeneration. Apolipoprotein E-ε4 (APOE-ε4), the major known genetic susceptibility factor for late-onset AD, is associated with an accelerated decline in episodic memory, a dramatic increase in the risk of AD and a gene dose-dependent decrease in the age of onset [2,3]. In presymptomatic APOE-ε4 carriers, enhanced gray-matter atrophy, greater β-amyloid deposition and diminished cerebral glucose metabolism in the same brain regions as AD patients are seen, although these findings are not universal [3–8]. Functional magnetic resonance imaging (fMRI) studies in APOE-ε4 carriers have shown differential patterns of brain activations during various memory tasks in the regions affected by AD, relative to noncarriers [9–13]. However, using traditional

task-driven fMRI methods, it is difficult to reveal disruptions in the large-scale distributed brain networks associated with specific cognitive functions in persons at risk for AD [14]. Resting-state functional connectivity MRI (R-fMRI) is a powerful, task-independent imaging modality that examines the functional connections between anatomically distinct brain regions within specific networks and investigates the neural substrates of the interindividual phenotypic variation in normal and different disease states [15–20]. R-fMRI shows great promise as an imaging biomarker in preclinical and clinical AD states [21–30].

While the intrinsic effects of the ε4 allele on the functional architecture of the brain has primarily been demonstrated in the default mode network (DMN) [22,23,25,27] and in nonAD-related resting-state networks (RSNs) [29], there are no studies to date that have identified functional connectivity (Fc) alterations in the other major cognitive networks, in middle-aged, cognitively intact APOE-ε4 carriers. Three major cognitive brain networks are identified in the resting brain; these include: (1) the DMN, which is involved in the episodic and autobiographical memory, semantic processing, self-monitoring, and related social cognitive functions;

**Table 1.** Demographics and neuropsychological characteristics.

|                             | APOE $\epsilon$ 4 carriers (n = 20) |      | APOE- $\epsilon$ 4 noncarriers (n = 26) |      | p value         |
|-----------------------------|-------------------------------------|------|-----------------------------------------|------|-----------------|
|                             | Mean                                | SD   | Mean                                    | SD   |                 |
| <b>Gender, female/male</b>  | 14/6                                |      | 17/9                                    |      | NS <sup>†</sup> |
| <b>Age, year</b>            | 52.4                                | 5.6  | 54.5                                    | 5.8  | 0.21*           |
| <b>Education, year</b>      | 15.0                                | 2.4  | 15.6                                    | 2.5  | 0.86*           |
| <b>RAVLT delayed recall</b> | 12.1                                | 2.2  | 13.1                                    | 1.9  | 0.10*           |
| <b>Digit Span</b>           | 16.6                                | 3.6  | 18.5                                    | 3.4  | 0.07*           |
| <b>Trail-making test</b>    |                                     |      |                                         |      |                 |
| <b>A</b>                    | 24.2                                | 8.3  | 23.5                                    | 8.7  | 0.81*           |
| <b>B</b>                    | 56.0                                | 19.4 | 50.2                                    | 18.7 | 0.31*           |
| <b>Beck Depression</b>      | 3.0                                 | 3.3  | 3.5                                     | 3.9  | 0.64*           |

Note: No differences were found in gender, age, education, RAVLT delayed recall, digit span, trail-making A and B, and Beck depression scores between the APOE- $\epsilon$ 4 carriers and noncarriers. Abbreviation: M, mean; SD, Standard Deviation; RAVLT, Rey Auditory Verbal Learning Test; NS, no significance;

<sup>†</sup>p value was obtained by  $\chi^2$  two-tailed test;

\*p values were obtained by an independent-sample two-tailed t test. Unless otherwise indicated, data are presented as mean  $\pm$  SD.  
doi:10.1371/journal.pone.0055902.t001

(2) the executive control network (ECN), which is critical for the control of working memory, and for judgment and decision making in the context of goal-directed behavior; and (3) the salience network (SN), which is involved in the orientation of attention to the most relevant internal brain events and external stimuli [30–32].

It is critical to study these three core cognitive RSNs in-depth because while episodic memory is the first cognitive domain to be affected, subtle nonamnesic deficits in executive control and attention are also found during the preclinical stages of AD [33,34]. Recent evidence has also shown significant Fc alterations that extend beyond the DMN to affect the ECN and SN, in individuals with amnesic mild cognitive impairment (aMCI) and mild to moderate AD [30]. Functional alterations in the DMN and SN connections were also recently demonstrated in elderly APOE- $\epsilon$ 4 carriers [35]. Interestingly, dynamic interactions have been identified between the DMN, ECN and SN in normal adults [32]. We postulated that the RSN disruptions are not isolated to the DMN and will extend beyond to involve the remainder of this tightly interconnected neural circuitry, even in middle-aged cognitively healthy  $\epsilon$ 4 carriers. The RSN disruptions are present even before gray-matter volume loss and cognitive decline are seen in genetically at-risk middle-aged individuals. These alterations, if identified, may provide a neural signature in identifying the individuals who are at increased risk for progression to AD.

The primary aim of this study was to test the hypothesis that while the greatest functional disruptions will be found in the DMN, significant Fc alterations also will be identified in the ECN and to a lesser degree in the SN in the APOE- $\epsilon$ 4 carriers, preceding cognitive decline and gray-matter volume loss, relative to noncarriers. We also hypothesize that the alterations in these RSNs in the at-risk group will be associated with episodic memory performance.

## Materials and Methods

### Participants

A total of 48 middle-aged, cognitively healthy (CN) subjects between the ages of 44 and 65 years were enrolled in this study through advertisements and mailings. Written informed consent was obtained from all subjects in accordance with the Medical

College of Wisconsin Institutional Review Board. Two subjects were excluded due to excessive motion during the MRI scan; therefore, the final sample consisted of a total of 46 subjects, who were included in this data analysis.

Demographic, family and medical histories were obtained from all subjects. All subjects denied impairment in memory or other cognitive skills, or activities of daily living and instrumental activities of daily living. They had no history of neurological disease, seizures, head injury with loss of consciousness within the past five years, stroke or transient ischemic attack, drug or alcohol abuse within the past five years, or major psychiatric disorders, including schizophrenia and other psychotic disorders, and mood disorders.

### Neuropsychological Assessment

All subjects had a normal neurological examination and a Hachinski Ischemia Score  $<1$ . Subjects scored within normal range on a brief battery of neuropsychological tests and the Beck Depression Inventory. Normal cognitive function was documented by scoring no more than 1 SD below the mean on the Rey Auditory-Verbal Learning Test (RAVLT) delayed recall and total learning (sum of trials 1–5), Boston Naming Test, Trail Making Test A & B and Digit Span Test scores [36–38]. **Table 1** summarizes the cognitive results for both groups. An experienced neurologist examined each subject, and two neurologists with expertise in evaluating persons with and without dementia reviewed the medical, neurological, functional and neuropsychological data, and consensus diagnoses were reached.

### APOE Genotyping

All participants provided a sample of DNA for APOE genotyping. The samples were collected by buccal swab, and analyzed for the presence of the APOE- $\epsilon$ 2, APOE- $\epsilon$ 3 and APOE- $\epsilon$ 4 alleles. The material obtained was pooled and DNA was extracted, using the Gentra Systems Autopure LS DNA processing system, in the Medical College of Wisconsin Clinical and Translational Science Institute's (CTSI) Core Laboratory. APOE genotyping from the extracted DNA was performed by restriction isotyping at the Oregon Health and Science University's CTSI Core Laboratory [39,40].

## MRI Acquisition

All scans were obtained using a whole-body 3T Signa GE scanner (Waukesha, WI) with a standard quadrature transmit-receive head coil. During the resting-state acquisitions, no specific cognitive tasks were performed, and the study participants were instructed to close their eyes, relax and stay awake. Sagittal resting-state fMRI datasets of the whole brain were obtained in six minutes with a single-shot gradient echo-echo planar imaging pulse sequence. The fMRI imaging parameters were: TE = 25 ms, TR = 2000 ms, flip angle of 90°; number of slices = 36; slice thickness 4 mm, matrix size = 64×64, field of view = 24×24 cm, total volumes = 180. High-resolution 3D spoiled gradient-recalled echo axial images were acquired for anatomical reference. The parameters were: TE/TR/TI = 4/10/450 ms; flip angle of 12°; number of slices = 144; slice thickness = 1 mm; matrix size = 256×192, FOV = 240×240 mm.

## Functional Connectivity MRI Processing and Analysis

**MRI preprocessing.** R-fMRI data analysis was performed, using Analysis of Functional NeuroImages (AFNI) software (<http://afni.nimh.nih.gov/afni>) and MatLab programs (Math-Works, Natick, MA). The spikes in the raw resting-state functional imaging data were removed (3dDespike); motion correction was performed by volume registration on R-fMRI data (3dvolreg); and detrending was carried out to remove Legendre polynomials (3dDetrend). Further, cardiac aliasing (AFNI command 3dretroicor -card) and the respiratory-volume variations were minimized (AFNI command 3dretroicor -resp). The signals in white matter and cerebrospinal fluid were regressed out, using averaged signals from the white matter and the ventricles, and the six-motion parameter vectors were regressed out from each voxel time series (program 3dDeconvolve) [41–45]. In addition, global signals were regressed out from the whole brain [19]. Finally, a bandpass filter was applied to keep only low-frequency fluctuations within the frequency range of 0.015 Hz and 0.1 Hz.

**Resting-State functional connectivity analysis.** Three seed regions of interest (ROI) were selected, based on previous publications [31,46,47]: DMN, posterior cingulate cortex (PCC) (Talairach coordinates: −1, −50, 26); ECN, right dorsolateral prefrontal cortex (DLPFC) (Talairach coordinates: 44, 36, 20); and SN, right orbital anterior insula (AI) (Talairach coordinates: 38, 26, −10). Six-millimeter spherical seed regions were placed at the above coordinates.

The various processing steps of seed-based voxelwise connectivity analysis for individual subjects have been described previously [48–50]. Briefly, coregistration and time course extraction (seed region, 3dfractionize) and voxelwise cross-correlation between the seed ROIs and the whole brain (3dfim+) were performed. The Pearson correlation coefficients were subjected to a Fisher's  $z$  transformation, which yielded variants of normal distribution (3dcalc) [51]. The voxelwise values were spatially transformed from original to Talairach space (adwarp) and smoothed with a 6-mm Gaussian kernel in order to obtain RSN maps for each individual subject.

## Voxel-based Morphometry Analysis

Optimized voxel-based morphometry (VBM) analysis was performed, using the VBM toolbox in SPM8 (<http://www.fil.ion.ucl.ac.uk/spm/software/spm8>). The individual T1-weighted images for all subjects were segmented, normalized, and then, smoothed at 6-mm full-width half maximum. The gray-matter (GM) volume (modulated images) corresponding to the study group-specific template was extracted to determine the GM

volume for the individual subject, and then, was entered into a two-sample  $t$ -test for group comparison.

## Statistical Analysis

**Demographics and clinical performance comparisons.** A two-sample  $t$ -test was used to test the differences in age, education, and behavior performances in RAVLT delayed recall (RAVLT-DR), Digit Span Test, Trail Making A & B, and the Beck Depression Inventory scores between APOE-ε4 carriers and noncarriers. Chi-square two-tail test was used to compare the group differences in gender.

**Group-Level analysis for the functional connectivity network.** Each of the three individual functional networks was obtained by two steps. First, the seed-based individual connectivity maps from each subject were grouped together according to APOE 4 carriers and noncarriers, respectively. Second, the patterns of each functional network were determined with a random-effects one-sample  $t$  test to identify significant clusters according to an AlphaSim program based on the Monte Carlo simulation algorithm ( $\alpha = 0.05$  voxelwise  $p < 0.01$ , cluster size  $> 1048 \text{ mm}^3$ ) (<http://afni.nimh.nih.gov/pub/dist/doc/manual/AlphaSim.pdf>).

To find brain regions with significant group differences, the connectivity alteration for each network across all subjects was examined, using a two-sample  $t$  test (corrected with AlphaSim,  $\alpha = 0.05$ , voxelwise  $p < 0.05$ , cluster size  $> 4048 \text{ mm}^3$ ). For each subject, the average functional connectivity strengths were extracted from all regions that showed significant differences in the DMN, ECN and SN networks between carriers and noncarriers. In the DMN and ECN, regions that showed significant differences between groups were separated into positive and anticorrelated (or negative) networks, based on the functional connectivity patterns in the APOE-ε4 noncarriers (i.e., control) group (Figure 1). We repeated the two-sample  $t$  tests after controlling for age, gender, education and GM volumes.

**Correlation of RAVLT-DR scores with the DMN, ECN, and SN network connectivity.** To investigate the neural substrates underlying the functions of the RAVLT-DR scores on each network, a multiple linear regression analysis was employed (3dRegAna, AFNI) as follows:

$$m_i = \beta_0 + \beta_1 \times \text{RAVLT} + \beta_2 \times \text{Gender} + \beta_3 \times \text{Education} + \beta_4 \times \text{Age} + \beta_5 \times \text{Group}$$

Where  $m_i$  is the  $m$  value of  $i$ th voxel across group subjects,  $\beta_0$  is the intercept of straight line fitting in the model.  $\beta_1$ ,  $\beta_2$ ,  $\beta_3$ ,  $\beta_4$  and  $\beta_5$  are the effects of RAVLT-DR scores, gender, education, age and individual groups on the functional connectivity strength of  $i$ th voxel within each network in the APOE-ε4 and noncarriers, respectively. The effects of  $\beta_2$ ,  $\beta_3$ ,  $\beta_4$  and  $\beta_5$  were discarded as covariance of no interest in the above linear regression model. The voxelwise multiple linear regression map was generated after multiple comparison correction (AlphaSim, AFNI,  $\alpha = 0.05$ , voxelwise  $p < 0.05$  and cluster size  $> 4,048 \text{ mm}^3$ ) to identify the neural correlates of RAVLT-DR for each network (**Figure S1 for details on data analysis**).

## Results

### Demographic and Neuropsychological Characteristics

Forty-six cognitively healthy adults were included in this data analysis. There were no statistical significant differences in age,

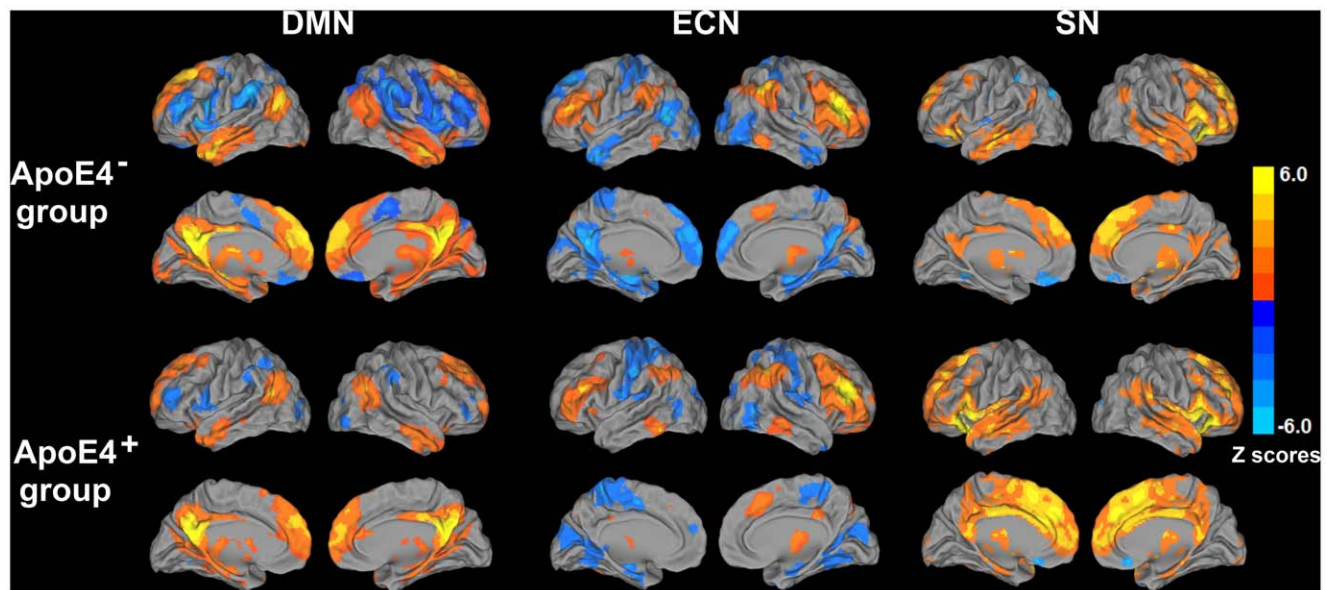

**Figure 1. Functional connectivity pattern of the default mode network (DMN), executive control network (ECN), and salience network (SN) in APOE- $\epsilon$ 4 carriers (ApoE4<sup>+</sup>) and nonAPOE- $\epsilon$ 4 carriers (ApoE4<sup>-</sup>).** Results are projected on a surface template (Caret software; Van Essen, 2005). Bright color indicates positive connectivity and the blue color indicates negative connectivity in ApoE4<sup>-</sup> and ApoE4<sup>+</sup> groups. Color bar is presented with z scores.  
doi:10.1371/journal.pone.0055902.g001

gender, education, cognitive and depressive symptom scores ( $p > 0.05$ ) between groups, although APOE- $\epsilon$ 4 carriers showed a trend toward lower RAVLT-DR ( $p = 0.10$ ) and Digit Span Test ( $p = 0.07$ ) scores, when compared to non  $\epsilon$ 4 carriers (**Table 1**).

### Neuroimaging Data

**Gray-Matter volumes in APOE- $\epsilon$ 4 carriers and noncarriers.** Optimized VBM analysis showed no differences in GM volumes between groups ( $p > 0.05$ ; familywise error corrected). We also performed permutation tests for group comparison of GM volumes. Again, no significant differences were found between APOE4 carriers and noncarriers.

**Resting-State networks in the APOE- $\epsilon$ 4 carriers and noncarriers.** (1) DMN: In the nonAPOE- $\epsilon$ 4 carriers, positive correlations were seen between PCC and bilateral hippocampus/parahippocampal (Hip/PHG) region, superior frontal gyri (SFG), dorsomedial prefrontal cortex (DMPFC), middle temporal gyrus (MTG), caudate and thalamus. Anticorrelated networks were seen with bilateral insula, DLPFC, inferior parietal cortex (IPC) and ventromedial prefrontal cortex (VMPFC) (**Figure 1**). For the APOE- $\epsilon$ 4 carriers, the DMN pattern also is shown in **Figure 1**.

When compared with noncarriers, the high-risk group showed significantly decreased positive DMN connectivity in the bilateral DMPFC and SFG, and the left Hip/PHG, anterior temporal pole (aTP) and middle occipital gyrus (MOG), whereas increased positive connectivity was found in the left lentiform nucleus and bilateral caudate (**Figure 2A and 2B, Table S1**). Also, diminished anticorrelated DMN connectivity was seen in insula and DLPFC bilaterally, and right IPC and VMPFC (**Figure 2C and 2D, Table S1**).

(2) ECN: The low-risk group showed positive correlations between right DLPFC and bilateral IPC, dorsal anterior cingulate cortex (dACC) and left DLPFC; and negative correlations between right DLPFC and bilateral hippocampus/parahippocampus, PCC, aTP, MTG, MOG, DMPFC and pre- and postcentral gyri

(**Figure 1**). For APOE- $\epsilon$ 4 carriers, the ECN pattern is demonstrated in **Figure 1**.

When compared with the control (non $\epsilon$ 4 carrier group), the APOE- $\epsilon$ 4 carriers showed decreased positive ECN connectivity in the left IPC and insula, and the right superior temporal gyrus (STG) (**Figure 3A and 3B, Table S2**). Also, decreased anticorrelated ECN connectivity was found in the bilateral SFG, DMPFC, PCC/precuneus and the MTG and hippocampus on the left, and the right MOG. Increased positive connectivity only was observed in the right ventrolateral prefrontal cortex (VLPFC) (**Figure 3C and 3D, Table S2**).

(3) SN: In the control group, while the positively correlated network included bilateral DLPFC, IPC, DMPFC, PCC, thalamus, caudate and the middle cingulate cortex (MCC), the anticorrelated network included precuneus, parahippocampus and the insula on the left, and bilateral orbitofrontal cortex (OFC) (**Figure 1**). For the APOE- $\epsilon$ 4 carriers, the SN pattern is illustrated in **Figure 1**.

The APOE- $\epsilon$ 4 carriers showed *increased* positively correlated network in the bilateral dACC, PCC and right precuneus, relative to the low-risk group (**Figure 4A and 4B, Table S3**). There were no regions with diminished AI connectivity, and no differences in the anticorrelated networks were observed.

All the above findings remained significant, even after controlling for age, gender, education and GM volumes.

Since the effects of head motion on the intrinsic functional connectivity is a concern [52,53], we performed the group-level analyses between APOE- $\epsilon$ 4+ and APOE- $\epsilon$ 4- on the DMN, ECN and SN after controlling the effects of head motion, using the root mean square as no interest covariates, respectively. We did not find significant changes of group-level comparison on the DMN, ECN, and SN with or without regressing out motion effects in our dataset.

**Exploratory analysis of the effects of RAVLT-DR scores on the RSNs across all subjects.** Episodic memory function is the earliest cognitive measure that shows decline in genetically

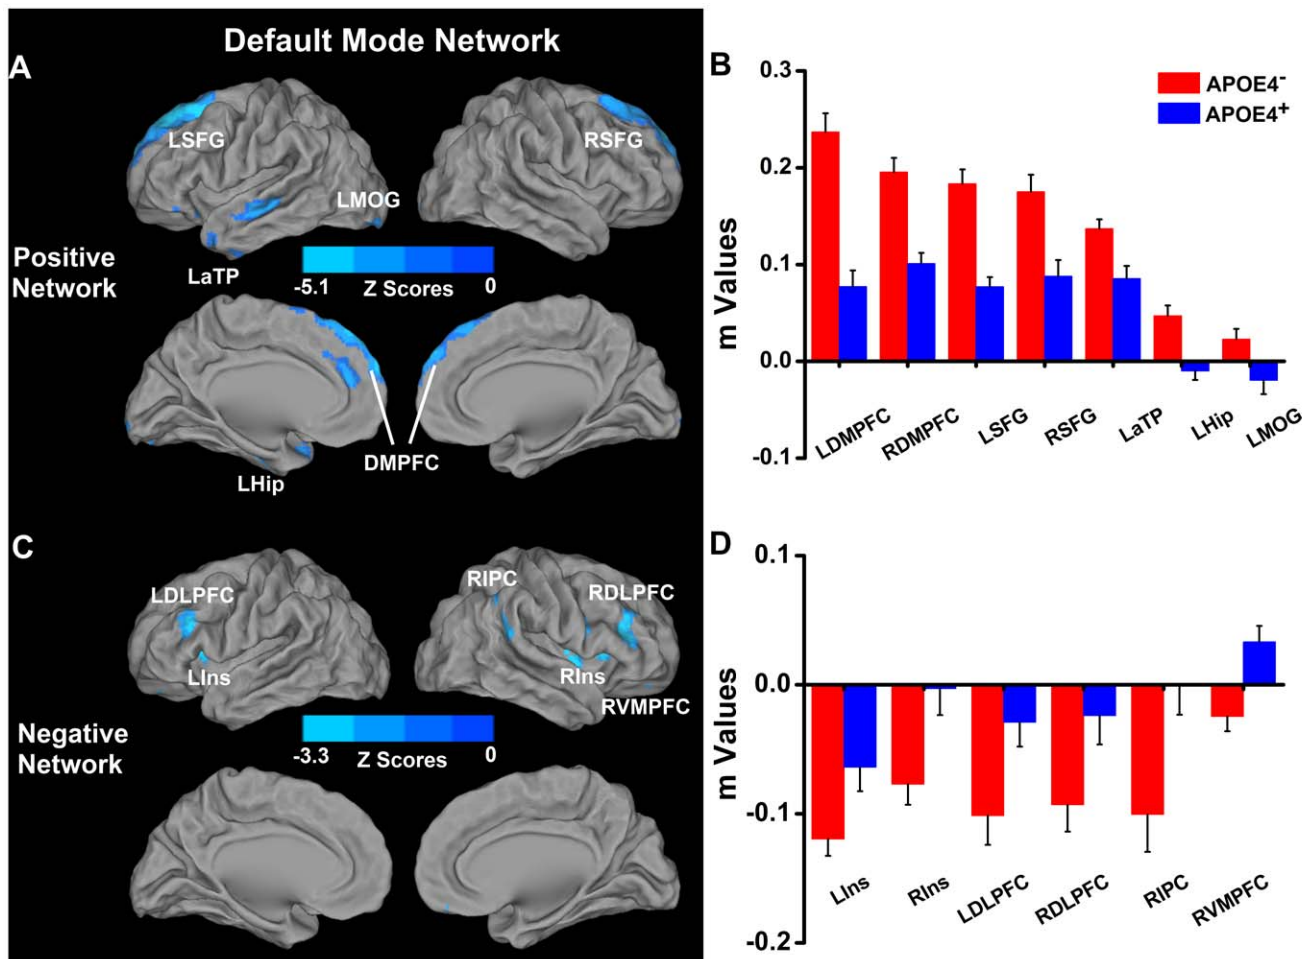

**Figure 2. Differential connectivity of DMN between APOE $\epsilon$ 4<sup>-</sup> and APOE $\epsilon$ 4<sup>+</sup> groups.** Left: location of significantly differential connectivity of DMN between ApoE $\epsilon$ 4<sup>-</sup> and ApoE $\epsilon$ 4<sup>+</sup> groups. Positive and negative networks were defined, based on the DMN pattern of ApoE $\epsilon$ 4<sup>-</sup> subjects (please refer to Figure 1). Blue color indicates significantly decreased positive and anticorrelated (or negative) network connectivity of the DMN in the ApoE $\epsilon$ 4<sup>+</sup> subjects in comparison to the ApoE $\epsilon$ 4<sup>-</sup> subjects (Figure 2A and 2C). Right: Quantitative representation of differential connectivity of DMN between ApoE $\epsilon$ 4<sup>-</sup> and ApoE $\epsilon$ 4<sup>+</sup> groups (Figure 2B and 2D). Abbreviations: LSFG, left superior frontal gyrus; RSFG, right superior frontal gyrus; LMOG, left middle occipital gyrus; LaTP, left anterior temporal pole; LHip, left hippocampus; LDMPFC, left dorsomedial prefrontal cortex; RDPFC, right dorsomedial prefrontal cortex; LDLPFC, left dorsolateral prefrontal cortex; RDLPC, right dorsolateral prefrontal cortex; RIPC, right inferior parietal cortex; LIns, left insula; RIns, right insula; RVMPFC, right ventromedial prefrontal cortex. NOTE: increased connectivity in the bilateral caudate and left lentiform nucleus is not shown in the figure (see Table S1). doi:10.1371/journal.pone.0055902.g002

predisposed individuals at risk for AD. Therefore, we did an exploratory analysis to identify the extent to which this cognitive domain is related to the altered Fc in the three networks across all subjects, after controlling for age, gender, education and subject group effects (Figure 5 and Table S4).

- (1) DMN: RAVLT-DR scores were positively correlated to the presomatomotor area (PreSMA) and lingual gyrus (LG) bilaterally; MFG and precuneus on the left; and ventrolateral PFC (VLPFC) and ACC on the right.
- (2) ECN: While the RAVLT-DR scores were negatively correlated to the operculum clusters bilaterally and right IPC/superior parietal cortex (SPC) cluster, memory performance was positively correlated to the right inferior temporal gyrus (ITG). We did not find any relationship between RAVLT-DR scores and SN Fc in any regions.

## Discussion

This is the first study to comprehensively identify functional connectivity alterations in the three RSNs implicated in cognition, in middle-aged adults with genetic risk for AD, preceding cognitive decline and gray-matter atrophy. We found the greatest Fc disruptions in the DMN, followed by the ECN and the least in the SN. We also have preliminary evidence to show that the alterations in the DMN and ECN are associated with memory performance in certain frontal, parietal and temporal regions across all subjects. The R-fMRI technique has great potential as an imaging endophenotype in preclinical AD research.

Our findings of diminished correlated and anticorrelated DMN Fc in APOE- $\epsilon$ 4 carriers, especially in the frontal lobe and medial temporal lobe (MTL) structures, have been previously demonstrated in the absence of brain fibrillar  $\beta$ -amyloid plaque deposition [25]. Also, diminished DMN Fc was also found in elderly APOE- $\epsilon$ 4 carriers [35]. In contrast, while predominantly increased DMN connections to the prefrontal cortices and MTL

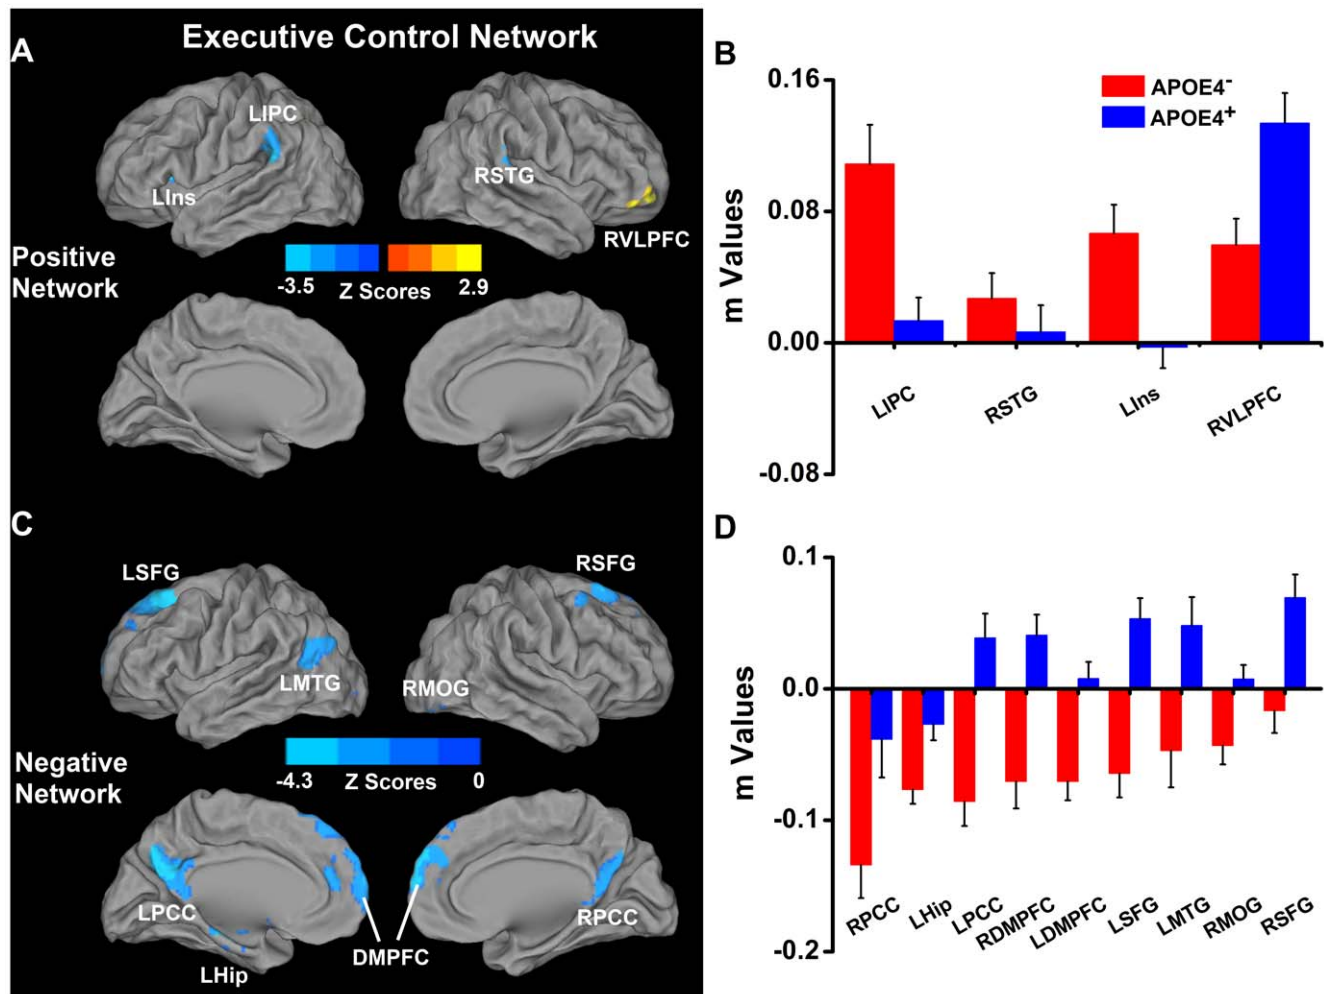

**Figure 3. Differential connectivity of ECN between APOE $\epsilon$ 4<sup>-</sup> and APOE $\epsilon$ 4<sup>+</sup> groups.** Left: location of significantly differential connectivity of ECN between ApoE $\epsilon$ 4<sup>-</sup> and ApoE $\epsilon$ 4<sup>+</sup> groups. Positive and negative networks were defined, based on the ECN pattern of the ApoE $\epsilon$ 4<sup>-</sup> subjects (Figure 1). Blue color indicates significantly decreased connectivity of the positive and anticorrelation (or negative) networks of the ECN in the ApoE $\epsilon$ 4<sup>+</sup> in comparison to the ApoE $\epsilon$ 4<sup>-</sup> subjects (Figure 3A and 3C). Right: Quantitative representation of the differential connectivity of the ECN between ApoE $\epsilon$ 4<sup>-</sup> and ApoE $\epsilon$ 4<sup>+</sup> groups (Figure 3B and 3D). Abbreviations: LIPC, left inferior parietal cortex; RSTG, right superior temporal gyrus; LIns, left insula; RVL PFC, right ventrolateral prefrontal cortex; LSFG, left superior frontal gyrus; RSFG, right superior frontal gyrus; LMTG, left middle temporal gyrus; RMOG, right middle occipital gyrus; LPCC, left posterior cingulate cortex; RPCC, right posterior cingulate cortex; LHip, left hippocampus; LDM PFC, left dorsomedial prefrontal cortex; RDM PFC, right dorsomedial prefrontal cortex.

regions were seen in young healthy  $\epsilon$ 4 carriers [22], APOE status had no effect on the DMN in another study [29]. The inconsistencies may be a result of the differences in the age of enrolled participants [22] and the methodology used to identify the RSNs (i.e., the independent component analysis [29] versus the seed-based ROI analysis used in our study). Regardless, we found increases in PCC Fc, though this was limited to the basal ganglia structures. We believe that these increased functional connections in the DMN reflect the compensatory recruitment of additional neural resources by which the high-risk subjects retain normal cognitive functions, as previously described in fMRI task-activation and resting-state studies [9,10,12,23,30].

We demonstrate for the first time that the core cognitive RSN disruptions extend beyond the DMN to include the ECN and SN in middle-aged individuals at genetic risk for AD. Structures within the task-positive ECN were significantly correlated to each other; the ECN seed was anticorrelated with brain regions in the DMN in our control group. This is consistent with the literature [18]. We

believe that the intactness of the correlated and anticorrelated functional connectivity patterns in these RSNs is critical for performing episodic and working memory, and executive control functions in healthy individuals. Interestingly, while we did not observe significant differences in the cognitive measures between the APOE- $\epsilon$ 4 carriers and noncarriers, decreases in the ECN connectivity were seen in the high-risk group. In AD, increased ECN connectivity previously has been reported relative to cognitively healthy normal persons [30,54,55]. Moreover, the increased frontal network connectivity observed in AD is more extensive, in comparison to aMCI and controls [30]. Patients with mild AD rely on increased ECN connectivity to compensate for a poorly functioning network (e.g., the DMN) as an attempt to improve cognitive performance. Our findings suggest that the increases in the ECN connections in the genetically at-risk individuals only may occur when cognitive decline is imminent and in those who have incipient AD. Future longitudinal studies are essential to elucidate this hypothesis.

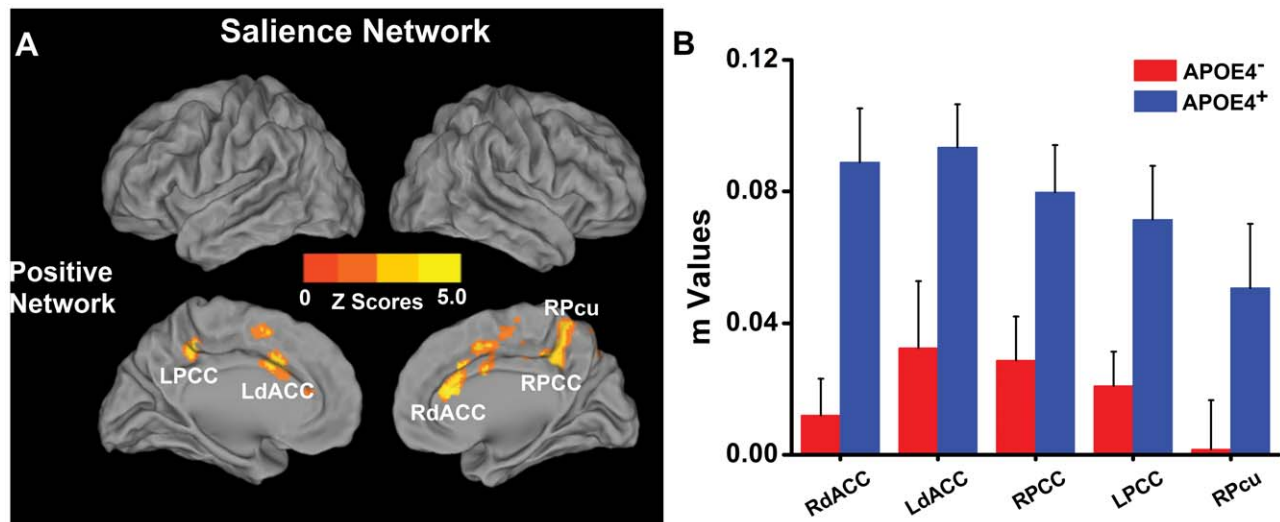

**Figure 4. Differential connectivity of SN between APOE $\epsilon$ 4<sup>-</sup> and APOE $\epsilon$ 4<sup>+</sup> groups.** Left: location of differential connectivity of DMN between ApoE $\epsilon$ 4<sup>-</sup> and ApoE $\epsilon$ 4<sup>+</sup> groups. Positive and negative networks were defined, based on the DMN pattern of the ApoE $\epsilon$ 4<sup>-</sup> subjects (Figure 1). Bright color indicates significantly increased positive SN connectivity in the ApoE $\epsilon$ 4<sup>+</sup> in comparison to the ApoE $\epsilon$ 4<sup>-</sup> subjects (Figure 4A). No significant anticorrelation network differences of the SN were found between the groups. Right: Quantitative representation of differential SN connectivity between ApoE $\epsilon$ 4<sup>-</sup> and ApoE $\epsilon$ 4<sup>+</sup> groups (Figure 4B). Abbreviations: RdACC, right dorsal anterior cingulate cortex; LdACC, left dorsal anterior cingulate cortex; LPCC, left posterior cingulate cortex; RPCC, right posterior cingulate cortex; RPcu, right precuneus. doi:10.1371/journal.pone.0055902.g004

The increased connections between the right AI with the dorsal ACC, PCC and precuneus, show for the first time that close functional interactions exist between the DMN and the SN in middle-aged individuals at high risk for AD. AI and ACC, core regions of the SN, are often coactivated during various internal and external salient stimuli. They play an important role in guiding behaviors associated with social, affective and higher order mental processes. AI, a crucial hub of the SN, is thought to mediate the dynamic interactions between other networks implicated in cognition, mainly the DMN and ECN. Increased Fc in the SN and decreased DMN Fc have been previously described in elderly cognitively healthy APOE- $\epsilon$ 4 carriers and in

patients with mild AD [35,55]. More sophisticated Granger causality analyses are needed to further address the dynamic interactions between these RSNs in individuals at risk for AD [56]. It is significant that the ECN and SN are originally defined with the right DLPFC and right AI as the seed regions according to the task-driven fMRI studies [31,57–59]. In using the left DLPFC and left AI as seeds, different results were found (see Table S5, Figure S2 and Figure S3). Further study is needed to address neurobiological significance.

The mechanisms that contribute to the Fc differences in the cognition-related neuronal circuits between carriers and noncarriers are not fully understood. One explanation is that the APOE-

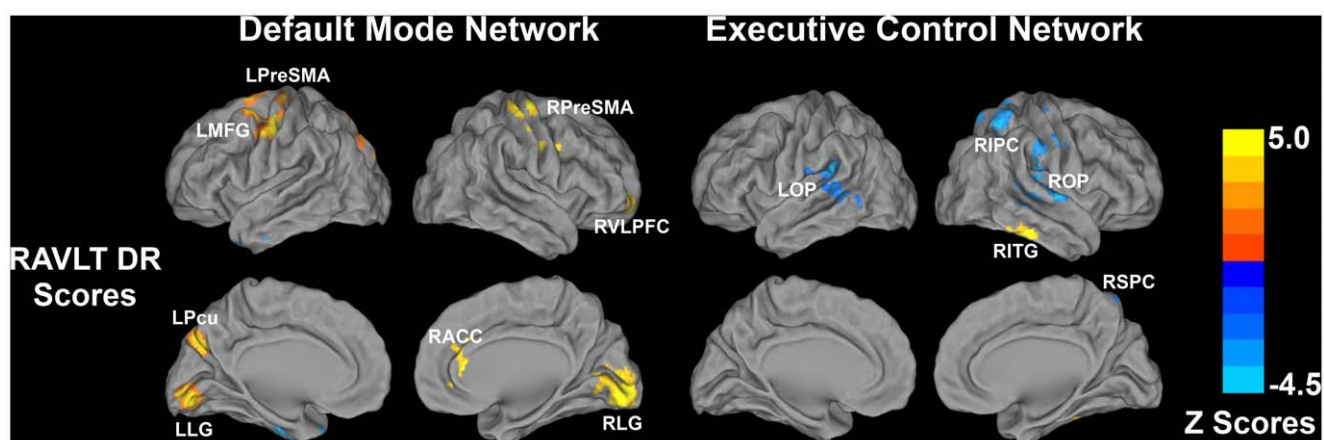

**Figure 5. Behavioral significance of the intrinsic DMN and ECN connectivity across all subjects.** Significant correlation between RAVLT delayed recall scores and the intrinsic connectivity of DMN and ECN was evident. No significant correlation was found between RAVLT delayed recall scores and the intrinsic connectivity of the SN. Bright color indicates positive correlation and blue color indicates negative correlation across all subjects. Color bar is presented with z scores. Abbreviation: RAVLT DR, Rey Auditory-Verbal Learning Test delayed recall; LPreSMA, left presomatomotor area; LMFG, left middle frontal gyrus; LPreSMA, left precuneus; LLG, left lingual gyrus; RPreSMA, right presomatomotor area; RVLPCF, right ventrolateral prefrontal cortex; RACC, right anterior cingulate cortex; RLG, right lingual gyrus; LOP, left operculum; ROP, right operculum; RIPC, right inferior parietal cortex; RITG, right inferior temporal gyrus; RSPC, right superior parietal cortex. doi:10.1371/journal.pone.0055902.g005

$\epsilon 4$  isoform increases  $\beta$ -amyloid aggregation in brain regions involved in these RSNs, thus leading to the observed functional disconnections.  $A\beta$  plaque deposition can precede neurodegeneration and clinical symptom onset in middle-aged adults at risk for AD. Interestingly, the MTL and neocortical areas that are functionally altered in the three RSNs also are early targets of  $\beta$ -amyloid plaque deposition [60–62]. In contrast, occipital lobe structures are only affected in the advanced phases of AD [63]. Moreover, alterations in noncognitive-associated RSNs are found in healthy  $\epsilon 4$ -carriers [29], and diminished DMN Fc is seen in the absence of cerebral amyloid pathology [25]. These findings suggest that the effects of APOE genetic status on the functional connections may not be fully mediated by amyloid pathology.

APOE also plays a critical role in the neuronal development, and the presence of  $\epsilon 4$ -allele is found to decrease neuronal growth and synaptic plasticity [64,65], thereby detrimentally affecting functional integration in cognitive networks by non $\beta$ -amyloid-dependent mechanisms. If so, it is plausible that the loss of functional integration, as evidenced by R-fMRI alterations in  $\epsilon 4$ -carriers, may precede commonly used AD biomarkers, including cerebral  $\beta$ -amyloid deposition, structural atrophy and neuropsychological deficits. APOE- $\epsilon 4$  also stimulates abnormal tau hyperphosphorylation and formation of neurofibrillary tangles (NFTs) [66]. Finally, APOE- $\epsilon 4$  impairs cholesterol delivery from astrocytes to neurons, and can accentuate neurodegeneration [67,68].

Our exploratory voxel-based whole-brain analyses showed a weak but statistically significant relationship between episodic memory performance and the DMN and ECN Fc in several cortical areas across the whole sample. Interestingly, the brain areas within these cognitive circuits that are recruited to perform episodic memory functions across all participants, after controlling for several factors, including the group status, do not overlap with the areas differentially affected in carriers. These results indicate that distinct brain structures are often involved in performing episodic memory-related functions in cognitively healthy normal individuals and APOE- $\epsilon 4$  carriers, further providing evidence of the brain's ability to balance and reorganize in normal and at-risk disease states.

Our study is not without limitations. First, this is a cross-sectional study. Future longitudinal studies are needed to disentangle the mechanisms linking APOE status, baseline cognition and brain function with the future incidence of AD. Second, while the lack of knowledge regarding the cerebral amyloid burden status is a limitation, DMN connectivity differences observed in this study are consistent with the findings reported in a sample free of cortical  $\beta$ -amyloid [25]. Third, in the ROI-based DMN analysis, different seeds have been used to study Fc, and it is possible that distinct locations may produce divergent results. However, our findings are consistent with recent observations that have used different DMN and SN seed regions [25,35]. Because our analysis is hypothesis driven, we limited our analysis to three RSNs; we plan to perform a data-driven, large-scale functional connectivity analysis in this cohort [69]. Fourth, cerebrovascular risk factors and disease are related to memory decline in  $\epsilon 4$ -allelic carriers [70,71]. Although our study did not enroll individuals with significant vascular disease, future studies need to examine the relationship of varying degrees of white-matter disease and altered structural connectivity with Fc differences in cognitively healthy  $\epsilon 4$ -allelic carriers. Fifth, because the primary objective of this study was to determine the effects of APOE on Fc in the cognitive RSNs, we did not examine the influence of family history of AD on the functional architecture of these networks. Finally, a gene dose-dependent relationship on

RSN Fc may exist in APOE carriers [29]. We were unable to explore this further because of small samples in  $\epsilon 2/\epsilon 3$  ( $N = 2$ ) and  $\epsilon 4/\epsilon 4$  ( $N = 4$ ) groups.

## Conclusions

In summary, we have shown for the first time that intrinsic functional connectivity alterations is present in the core RSNs implicated in cognition beyond the DMN, even before gray-matter volume loss and the onset of cognitive decline, in middle-aged,  $\epsilon 4$  carriers. Functional connectivity endophenotypes that are identified, using R-fMRI, can unravel the influence of APOE in middle-aged, cognitively healthy individuals with a genetic risk for AD. We also show the preliminary evidence of the effects of episodic memory performance on the altered Fc in the DMN and ECN, in cognitively normal individuals. Prospective studies that address the use of R-fMRI technique as a potential biomarker for predicting conversion from normal to early AD is needed, in  $\epsilon 4$  carriers.

## Supporting Information

**Figure S1 Flowchart of data process.** Abbreviation: SPGR, spoiled gradient-recalled echo sequence; fMRI: functional magnetic resonance imaging; PCC, posterior cingulate cortex; AI, anterior insula; R DLPFC, right dorsolateral prefrontal cortex; DMN, default mode network; ECN, executive control network; SN, salience network; RAVLT-DR: Rey auditory verbal learning test delayed recall. (DOC)

**Figure S2 Patterns of Left DLPFC and Left Anterior Insula Functional Networks in APOE- $\epsilon 4$  carriers (ApoE4+) and APOE- $\epsilon 4$  noncarriers (ApoE4-) ( $p < 0.05$ , corrected with AlphaSim).** Results are projected on a surface template (Caret software; Van Essen, 2005). Bright color indicates positive connectivity and blue color indicates negative connectivity in ApoE4<sup>+</sup> and ApoE4<sup>−</sup> groups. Color bar is presented with  $z$  scores. Abbreviation: DLPFC, dorsolateral prefrontal cortex; AI, anterior insula. (DOC)

**Figure S3 Functional Connectivity Differences of Left DLPFC Network and Left AI Network between APOE- $\epsilon 4$  carriers and noncarriers ( $p < 0.05$ , corrected with AlphaSim).** In the left DLPFC network, the APOE- $\epsilon 4$  carriers showed significantly diminished connectivity in the bilateral superior prefrontal cortex (LSFG/RSFG) and anterior temporal pole (LaTP/RaTP), and right posterior middle temporal gyrus (RpMTG). In the left AI network, significantly decreased functional connections were found in the bilateral PCC (LPCC/RPCC), right DLPFC (RDLPFC) and cuneus (RCun), left inferior parietal cortex/posterior middle temporal gyrus (LIPC/pMTG), and left ventral medial prefrontal cortex (vmPFC), relative to noncarriers. Blue color indicates decreased connectivity of left DLPFC network and left AI network in ApoE4 carriers compared to ApoE4 non-carriers. Color bar is presented with  $z$  scores. Abbreviation: DLPFC, dorsolateral prefrontal cortex; AI, anterior insula. (DOC)

**Table S1 Differential connectivity of DMN in APOE $\epsilon 4$  carriers compared with non  $\epsilon 4$  carriers.** Notes: x,y,z, coordinates of primary peak locations in the Talairach space. Abbreviation: BA, Brodmann area; L/R, left/Right; DMPFC, dorsomedial prefrontal cortex; SFG, superior frontal gyrus; MOG, middle occipital gyrus; Hip/PHG, hippocampus/parahippocampal gyrus; aTP, anterior temporal pole; DLPFC, dorsolateral

prefrontal cortex; IPC, inferior parietal cortex; VMPFC, ventromedial prefrontal cortex.  
(DOC)

**Table S2 Differential connectivity of ECN in APOE $\epsilon$ 4 carriers compared with non- $\epsilon$ 4 carriers.** Notes: x,y,z, coordinates of primary peak locations in the Talairach space. Abbreviation: BA, Brodmann area; L/R, left/right; IPC, inferior parietal cortex; STG, superior temporal gyrus; VLPFC, ventrolateral prefrontal cortex; SFG, superior frontal gyrus; DMPFC, dorsomedial prefrontal cortex; MOG, middle occipital gyrus; PCC, posterior cingulate cortex; Hip/PHG, hippocampus/parahippocampal gyrus; MTG, middle temporal gyrus.  
(DOC)

**Table S3 Differential connectivity of SN in APOE $\epsilon$ 4 carriers compared with non- $\epsilon$ 4 carriers.** Notes: x,y,z, coordinates of primary peak locations in the Talairach space. Abbreviation: BA, Brodmann area; L/R, left/right; dACC, dorsal anterior cingulate cortex; PCC, posterior cingulate cortex.  
(DOC)

**Table S4 The effects of RAVLT scores on the DMN and ECN across all subjects.** Notes: x,y,z, coordinates of primary peak locations in the Talairach space. Abbreviation: BA, Brodmann area; L/R, left/right; MFG, middle frontal gyrus; PreSMA, pre-somatomotor area; PCC, posterior cingulate cortex; VLPFC, ventrolateral prefrontal cortex; ACC, anterior cingulate

cortex; IPC, inferior parietal cortex; SPC, superior parietal cortex; ITG, inferior temporal gyrus.  
(DOC)

**Table S5 Differential connectivity of left DLPFC network and left AI network in APOE $\epsilon$ 4 carriers compared with non- $\epsilon$ 4 carriers.** Notes: x,y,z, coordinates of primary peak locations in the Talairach space. Abbreviation: DLPFC, dorsolateral prefrontal cortex; AI, anterior insula; BA, Brodmann area; L/R, left/right; SFG, superior frontal gyrus; aTP, anterior temporal pole; pMTG, posterior middle temporal gyrus; PCC, posterior cingulate cortex; vmPFC, ventromedial prefrontal cortex; IPC, inferior parietal cortex; AG, angular gyrus.  
(DOC)

## Acknowledgments

The authors thank Ms. Carrie M. O'Connor, M.A., for editorial assistance, Mr. Douglas Ward, M.S., for assistance with statistical analysis, and Ms. Judi Zaferos-Pylant and Mr. Yu Liu, M.S., for MRI technical support.

## Author Contributions

Conceived and designed the experiments: PGA SJL JSG CX. Performed the experiments: JIJ MBF PGA SJL. Critical revision of manuscript for important intellectual content: JSG CX GC WL MBF JIJ PGA SJL. Statistical expertise: BDW. Final approval: JSG CX GC WL BDW MBF JIJ PGA SJL. Analyzed the data: JSG CX GC WL BDW SJL. Wrote the paper: JSG CX SJL.

## References

- Petrella JR, Mattay VS, Doraiswamy PM (2008) Imaging genetics of brain longevity and mental wellness: the next frontier? *Radiology* 246: 20–32.
- Corder EH, Saunders AM, Strittmatter WJ, Schmechel DE, Gaskell PC, et al. (1993) Gene dose of apolipoprotein E type 4 allele and the risk of Alzheimer's disease in late onset families. *Science* 261: 921–923.
- Caselli RJ, Dueck AC, Osborne D, Sabbagh MN, Connor DJ, et al. (2009) Longitudinal modeling of age-related memory decline and the APOE epsilon4 effect. *N Engl J Med* 361: 255–263.
- Reiman EM, Chen K, Alexander GE, Caselli RJ, Bandy D, et al. (2005) Correlations between apolipoprotein E epsilon4 gene dose and brain-imaging measurements of regional hypometabolism. *Proc Natl Acad Sci U S A* 102: 8299–8302.
- Reiman EM, Chen K, Liu X, Bandy D, Yu M, et al. (2009) Fibrillar amyloid-beta burden in cognitively normal people at 3 levels of genetic risk for Alzheimer's disease. *Proc Natl Acad Sci U S A* 106: 6820–6825.
- Donix M, Burggren AC, Suthana NA, Siddarth P, Ekstrom AD, et al. (2010) Longitudinal changes in medial temporal cortical thickness in normal subjects with the APOE-4 polymorphism. *Neuroimage* 53: 37–43.
- Morris JC, Roe CM, Xiong C, Fagan AM, Goate AM, et al. (2010) APOE predicts amyloid-beta but not tau Alzheimer pathology in cognitively normal aging. *Ann Neurol* 67: 122–131.
- Vemuri P, Wiste HJ, Weigand SD, Knopman DS, Shaw LM, et al. (2010) Effect of apolipoprotein E on biomarkers of amyloid load and neuronal pathology in Alzheimer disease. *Ann Neurol* 67: 308–316.
- Bookheimer SY, Strojwas MH, Cohen MS, Saunders AM, Pericak-Vance MA, et al. (2000) Patterns of brain activation in people at risk for Alzheimer's disease. *N Engl J Med* 343: 450–456.
- Bondi MW, Houston WS, Eyler LT, Brown GG (2005) fMRI evidence of compensatory mechanisms in older adults at genetic risk for Alzheimer disease. *Neurology* 64: 501–508.
- Johnson SC, Schmitz TW, Trivedi MA, Ries ML, Torgerson BM, et al. (2006) The influence of Alzheimer disease family history and apolipoprotein E epsilon4 on mesial temporal lobe activation. *J Neurosci* 26: 6069–6076.
- Seidenberg M, Guidotti L, Nielson KA, Woodard JL, Durgierian S, et al. (2009) Semantic memory activation in individuals at risk for developing Alzheimer disease. *Neurology* 73: 612–620.
- Xu G, McLaren DG, Ries ML, Fitzgerald ME, Bendlin BB, et al. (2009) The influence of parental history of Alzheimer's disease and apolipoprotein E epsilon4 on the BOLD signal during recognition memory. *Brain* 132: 383–391.
- Mesulam MM (1998) From sensation to cognition. *Brain* 121 (Pt 6): 1013–1052.
- Biswal B, Yetkin FZ, Haughton VM, Hyde JS (1995) Functional connectivity in the motor cortex of resting human brain using echo-planar MRI. *Magn Reson Med* 34: 537–541.
- Biswal BB, Mennes M, Zuo XN, Gohel S, Kelly C, et al. (2010) Toward discovery science of human brain function. *Proc Natl Acad Sci U S A* 107: 4734–4739.
- Fox MD, Raichle ME (2007) Spontaneous fluctuations in brain activity observed with functional magnetic resonance imaging. *Nat Rev Neurosci* 8: 700–711.
- Fox MD, Snyder AZ, Vincent JL, Corbetta M, Van Essen DC, et al. (2005) The human brain is intrinsically organized into dynamic, anticorrelated functional networks. *Proc Natl Acad Sci U S A* 102: 9673–9678.
- Fox MD, Zhang D, Snyder AZ, Raichle ME (2009) The global signal and observed anticorrelated resting state brain networks. *J Neurophysiol* 101: 3270–3283.
- Kelly C, Biswal BB, Craddock RC, Castellanos FX, Milham MP (2012) Characterizing variation in the functional connectome: promise and pitfalls. *Trends Cogn Sci* 16: 181–188.
- Buckner RL, Sepulcre J, Talukdar T, Krienen FM, Liu H, et al. (2009) Cortical hubs revealed by intrinsic functional connectivity: mapping, assessment of stability, and relation to Alzheimer's disease. *J Neurosci* 29: 1860–1873.
- Filippini N, MacIntosh BJ, Hough MG, Goodwin GM, Frisoni GB, et al. (2009) Distinct patterns of brain activity in young carriers of the APOE-epsilon4 allele. *Proc Natl Acad Sci U S A* 106: 7209–7214.
- Fleisher AS, Sherzai A, Taylor C, Langbaum JB, Chen K, et al. (2009) Resting-state BOLD networks versus task-associated functional MRI for distinguishing Alzheimer's disease risk groups. *NeuroImage* 47: 1678–1690.
- Hedden T, Van Dijk KR, Becker JA, Mehta A, Sperling RA, et al. (2009) Disruption of functional connectivity in clinically normal older adults harboring amyloid burden. *J Neurosci* 29: 12686–12694.
- Sheline YI, Morris JC, Snyder AZ, Price JL, Yan Z, et al. (2010) APOE4 allele disrupts resting state fMRI connectivity in the absence of amyloid plaques or decreased CSF Abeta42. *J Neurosci* 30: 17035–17040.
- Sheline YI, Raichle ME, Snyder AZ, Morris JC, Head D, et al. (2010) Amyloid plaques disrupt resting state default mode network connectivity in cognitively normal elderly. *Biol Psychiatry* 67: 584–587.
- Westlye ET, Lundervold A, Rootwelt H, Lundervold AJ, Westlye LT (2011) Increased hippocampal default mode synchronization during rest in middle-aged and elderly APOE epsilon4 carriers: relationships with memory performance. *J Neurosci* 31: 7775–7783.
- Li W, Antuono PG, Xie C, Chen G, Jones JL, et al. (2012) Changes in regional cerebral blood flow and functional connectivity in the cholinergic pathway associated with cognitive performance in subjects with mild Alzheimer's disease after 12-week donepezil treatment. *NeuroImage* 60: 1083–1091.
- Trachtenberg AJ, Filippini N, Ebmeier KP, Smith SM, Karpe F, et al. (2012) The effects of APOE on the functional architecture of the resting brain. *Neuroimage* 59: 565–572.
- Agosta F, Pievani M, Geroldi C, Copetti M, Frisoni GB, et al. (2012) Resting state fMRI in Alzheimer's disease: beyond the default mode network. *Neurobiol Aging* 33: 1564–1578.
- Seeley WW, Menon V, Schatzberg AF, Keller J, Glover GH, et al. (2007) Dissociable intrinsic connectivity networks for salience processing and executive control. *J Neurosci* 27: 2349–2356.

32. Menon V, Uddin LQ (2010) Saliency, switching, attention and control: a network model of insula function. *Brain Struct Funct* 214: 655–667.
33. Backman L, Jones S, Berger AK, Laukka EJ, Small BJ (2005) Cognitive impairment in preclinical Alzheimer's disease: a meta-analysis. *Neuropsychology* 19: 520–531.
34. Storandt M, Grant EA, Miller JP, Morris JC (2006) Longitudinal course and neuropathologic outcomes in original vs revised MCI and in pre-MCI. *Neurology* 67: 467–473.
35. Machulda MM, Jones DT, Vemuri P, McDade E, Avula R, et al. (2011) Effect of APOE epsilon4 status on intrinsic network connectivity in cognitively normal elderly subjects. *Arch Neurol* 68: 1131–1136.
36. Rosen WG, Terry RD, Fuld PA, Katzman R, Peck A (1980) Pathological verification of ischemic score in differentiation of dementias. *Ann Neurol* 7: 486–488.
37. Beck AT, Steer RA, Brown GK (1996) Manual for the Beck Depression Inventory-II. San Antonio, TX: Psychological Corporation.
38. Lezak MD, Howieson DB, Loring DW (2004) Neuropsychological Assessment. New York: Oxford University Press.
39. Saunders AM, Huette O, Welsh-Bohmer KA, Schmechel DE, Crain B, et al. (1996) Specificity, sensitivity, and predictive value of apolipoprotein-E genotyping for sporadic Alzheimer's disease. *Lancet* 348: 90–93.
40. Mayeux R, Saunders AM, Shea S, Mirra S, Evans D, et al. (1998) Utility of the apolipoprotein E genotype in the diagnosis of Alzheimer's disease. Alzheimer's Disease Centers Consortium on Apolipoprotein E and Alzheimer's Disease. *N Engl J Med* 338: 506–511.
41. Cox RW (1996) AFNI: software for analysis and visualization of functional magnetic resonance neuroimages. *Comput Biomed Res* 29: 162–173.
42. Glover GH, Li TQ, Ress D (2000) Image-based method for retrospective correction of physiological motion effects in fMRI: RETROICOR. *Magn Reson Med* 44: 162–167.
43. Rombouts SA, Stam CJ, Kuijter JP, Scheltens P, Barkhof F (2003) Identifying confounds to increase specificity during a "no task condition". Evidence for hippocampal connectivity using fMRI. *Neuroimage* 20: 1236–1245.
44. Birn RM, Murphy K, Bandettini PA (2008) The effect of respiration variations on independent component analysis results of resting state functional connectivity. *Hum Brain Mapp* 29: 740–750.
45. Orlanidis SJ (1996) Introduction to signal processing. Upper Saddle River, NJ: Prentice Hall.
46. Greicius MD, Krasnow B, Reiss AL, Menon V (2003) Functional connectivity in the resting brain: a network analysis of the default mode hypothesis. *Proc Natl Acad Sci U S A* 100: 253–258.
47. Andrews-Hanna JR, Reidler JS, Sepulcre J, Poulin R, Buckner RL (2010) Functional-anatomic fractionation of the brain's default network. *Neuron* 65: 550–562.
48. Goveas J, Xie C, Wu Z, Douglas Ward B, Li W, et al. (2011) Neural correlates of the interactive relationship between memory deficits and depressive symptoms in nondemented elderly: resting fMRI study. *Behav Brain Res* 219: 205–212.
49. Goveas JS, Xie C, Ward BD, Wu Z, Li W, et al. (2011) Recovery of hippocampal network connectivity correlates with cognitive improvement in mild Alzheimer's disease patients treated with donepezil assessed by resting-state fMRI. *J Magn Reson Imaging* 34: 764–773.
50. Xie C, Goveas J, Wu Z, Li W, Chen G, et al. (2012) Neural basis of the association between depressive symptoms and memory deficits in nondemented subjects: resting-state fMRI study. *Hum Brain Mapp* 33: 1352–1363.
51. Zar J (1996) Biostatistical analysis. Upper Saddle River, NJ: Prentice-Hall.
52. Muraskin J, Ooi MB, Goldman RI, Krueger S, Thomas WJ, et al. (2012) Prospective active marker motion correction improves statistical power in BOLD fMRI. *Neuroimage*.
53. Van Dijk KR, Sabuncu MR, Buckner RL (2012) The influence of head motion on intrinsic functional connectivity MRI. *Neuroimage* 59: 431–438.
54. Qi Z, Wu X, Wang Z, Zhang N, Dong H, et al. (2010) Impairment and compensation coexist in amnesic MCI default mode network. *Neuroimage* 50: 48–55.
55. Zhou J, Greicius MD, Gennatas ED, Growdon ME, Jang JY, et al. (2010) Divergent network connectivity changes in behavioural variant frontotemporal dementia and Alzheimer's disease. *Brain* 133: 1352–1367.
56. Sridharan D, Levitin DJ, Menon V (2008) A critical role for the right fronto-insular cortex in switching between central-executive and default-mode networks. *Proc Natl Acad Sci U S A* 105: 12569–12574.
57. Craig AD (2002) How do you feel? Interoception: the sense of the physiological condition of the body. *Nat Rev Neurosci* 3: 655–666.
58. Curtis CE, D'Esposito M (2003) Persistent activity in the prefrontal cortex during working memory. *Trends Cogn Sci* 7: 415–423.
59. Kerns JG, Cohen JD, MacDonald AW III, Cho RY, Stenger VA, et al. (2004) Anterior cingulate conflict monitoring and adjustments in control. *Science* 303: 1023–1026.
60. Villemagne VL, Pike KE, Darby D, Maruff P, Savage G, et al. (2008) Abeta deposits in older non-demented individuals with cognitive decline are indicative of preclinical Alzheimer's disease. *Neuropsychologia* 46: 1688–1697.
61. Jack CR Jr, Lowe VJ, Weigand SD, Wiste HJ, Senjem ML, et al. (2009) Serial PIB and MRI in normal, mild cognitive impairment and Alzheimer's disease: implications for sequence of pathological events in Alzheimer's disease. *Brain* 132: 1355–1365.
62. Resnick SM, Sojkova J, Zhou Y, An Y, Ye W, et al. (2010) Longitudinal cognitive decline is associated with fibrillar amyloid-beta measured by [11C]PIB. *Neurology* 74: 807–815.
63. Sojkova J, Driscoll I, Iacono D, Zhou Y, Codispoti KE, et al. (2011) In vivo fibrillar beta-amyloid detected using [11C]PIB positron emission tomography and neuropathologic assessment in older adults. *Arch Neurol* 68: 232–240.
64. Nathan BP, Bellosta S, Sanan DA, Weisgraber KH, Mahley RW, et al. (1994) Differential effects of apolipoproteins E3 and E4 on neuronal growth in vitro. *Science* 264: 850–852.
65. Zhong N, Weisgraber KH (2009) Understanding the basis for the association of apoE4 with Alzheimer's disease: opening the door for therapeutic approaches. *Curr Alzheimer Res* 6: 415–418.
66. Tiraboschi P, Hansen LA, Masliah E, Alford M, Thal LJ, et al. (2004) Impact of APOE genotype on neuropathologic and neurochemical markers of Alzheimer disease. *Neurology* 62: 1977–1983.
67. Gong JS, Kobayashi M, Hayashi H, Zou K, Sawamura N, et al. (2002) Apolipoprotein E (ApoE) isoform-dependent lipid release from astrocytes prepared from human ApoE3 and ApoE4 knock-in mice. *J Biol Chem* 277: 29919–29926.
68. Rapp A, Gmeiner B, Hutterer M (2006) Implication of apoE isoforms in cholesterol metabolism by primary rat hippocampal neurons and astrocytes. *Biochimie* 88: 473–483.
69. Chen G, Ward BD, Xie C, Li W, Wu Z, et al. (2011) Classification of Alzheimer disease, mild cognitive impairment, and normal cognitive status with large-scale network analysis based on resting-state functional MR imaging. *Radiology* 259: 213–221.
70. Yip AG, McKee AC, Green RC, Wells J, Young H, et al. (2005) APOE, vascular pathology, and the AD brain. *Neurology* 65: 259–265.
71. Caselli RJ, Dueck AC, Locke DE, Sabbagh MN, Ahern GL, et al. (2011) Cerebrovascular risk factors and preclinical memory decline in healthy APOE epsilon4 homozygotes. *Neurology* 76: 1078–1084.
